# Supplementary material
Source: Springer Nature journal article supplement (https://www.springermedizin.de/resource/supplementary/12913_2013_2826_MOESM1_ESM.pdf/9531630)

**TB CLINIC**

**Newly diagnosed as HIV-positive  
297**

**Referred to HIV care  
176 (59.3%)**

**Not referred to HIV care  
121 (40.7%)**

**ART CLINIC**

**Enrolled  
61 (34.7%)**

**Not enrolled  
115 (65.3%)**

**Enrolled  
24 (19.8%)**

**Not enrolled  
97 (80.2%)**

**Enrolled in HIV care  
85 (28.6%)**

**Not enrolled in HIV care  
212 (71.4%)**

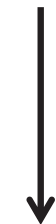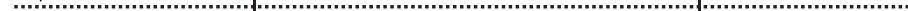

Supplement: MOESM1 [file 9531630]
